# Supplementary material for: Russian collection of Brucella abortus vaccine strains: annotation, implementation and genomic analysis
Source: Frontiers journal article supplement (doi:10.3389/fvets.2023.1154520), 2023-06-21

# Mutations in conservative sites

wbkA, G225V

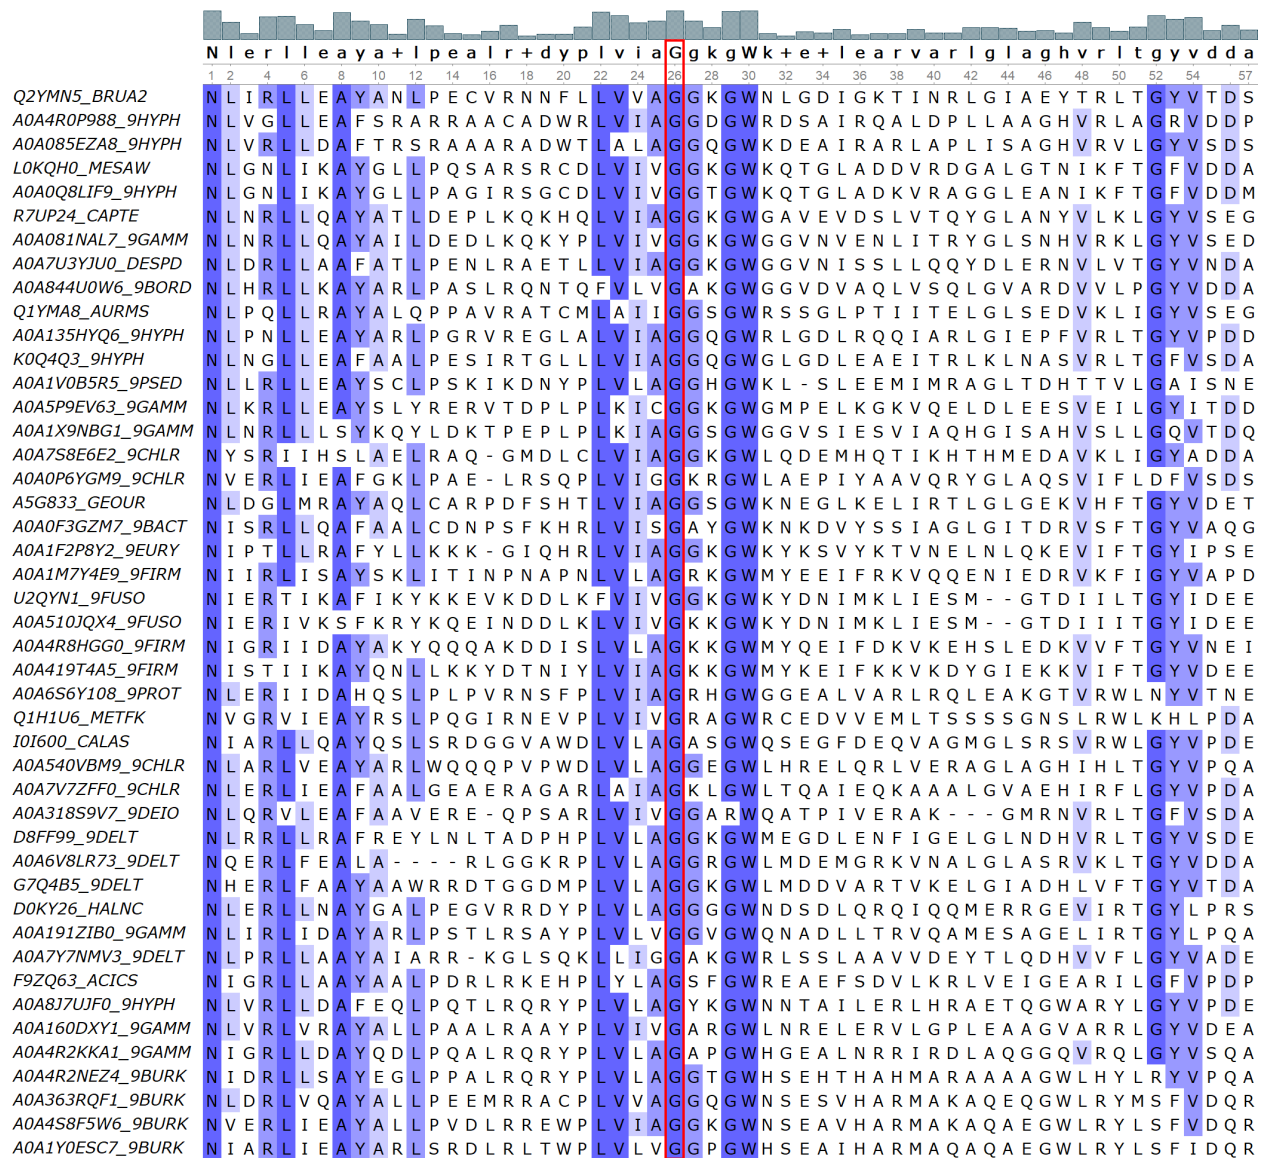

wboA, W219L  
Glycosyl transferase domain ( InterPro entry IPR001296)

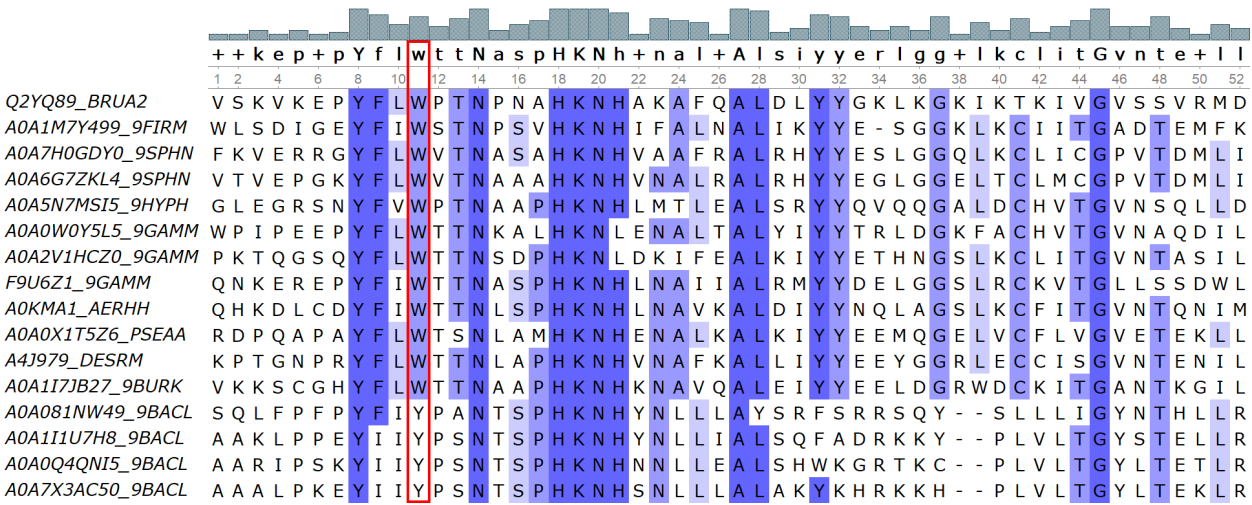

Supplemental Figure 2. The multiple alignment of bacterial glycosyltransferases from UniProt database which are homologous to the wboA protein of Brucella abortus (Q2YQ89\_BRUA2). The site of substitution W219L observed in strains 75/79-AB and 82 is indicated by red rectangle. The intensity of blue color corresponds to conservation level.

## Alpha-D-phosphohexomutase, alpha/beta/alpha domain III (InterPro entry IPR005846)

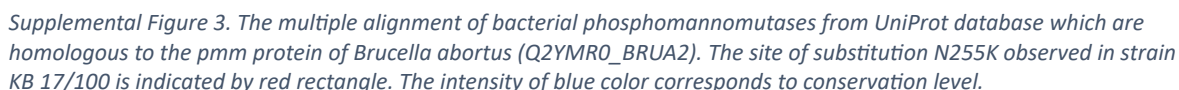

# wbkA, A321E

Glycosyl transferase family 1 domain (IPR001296)

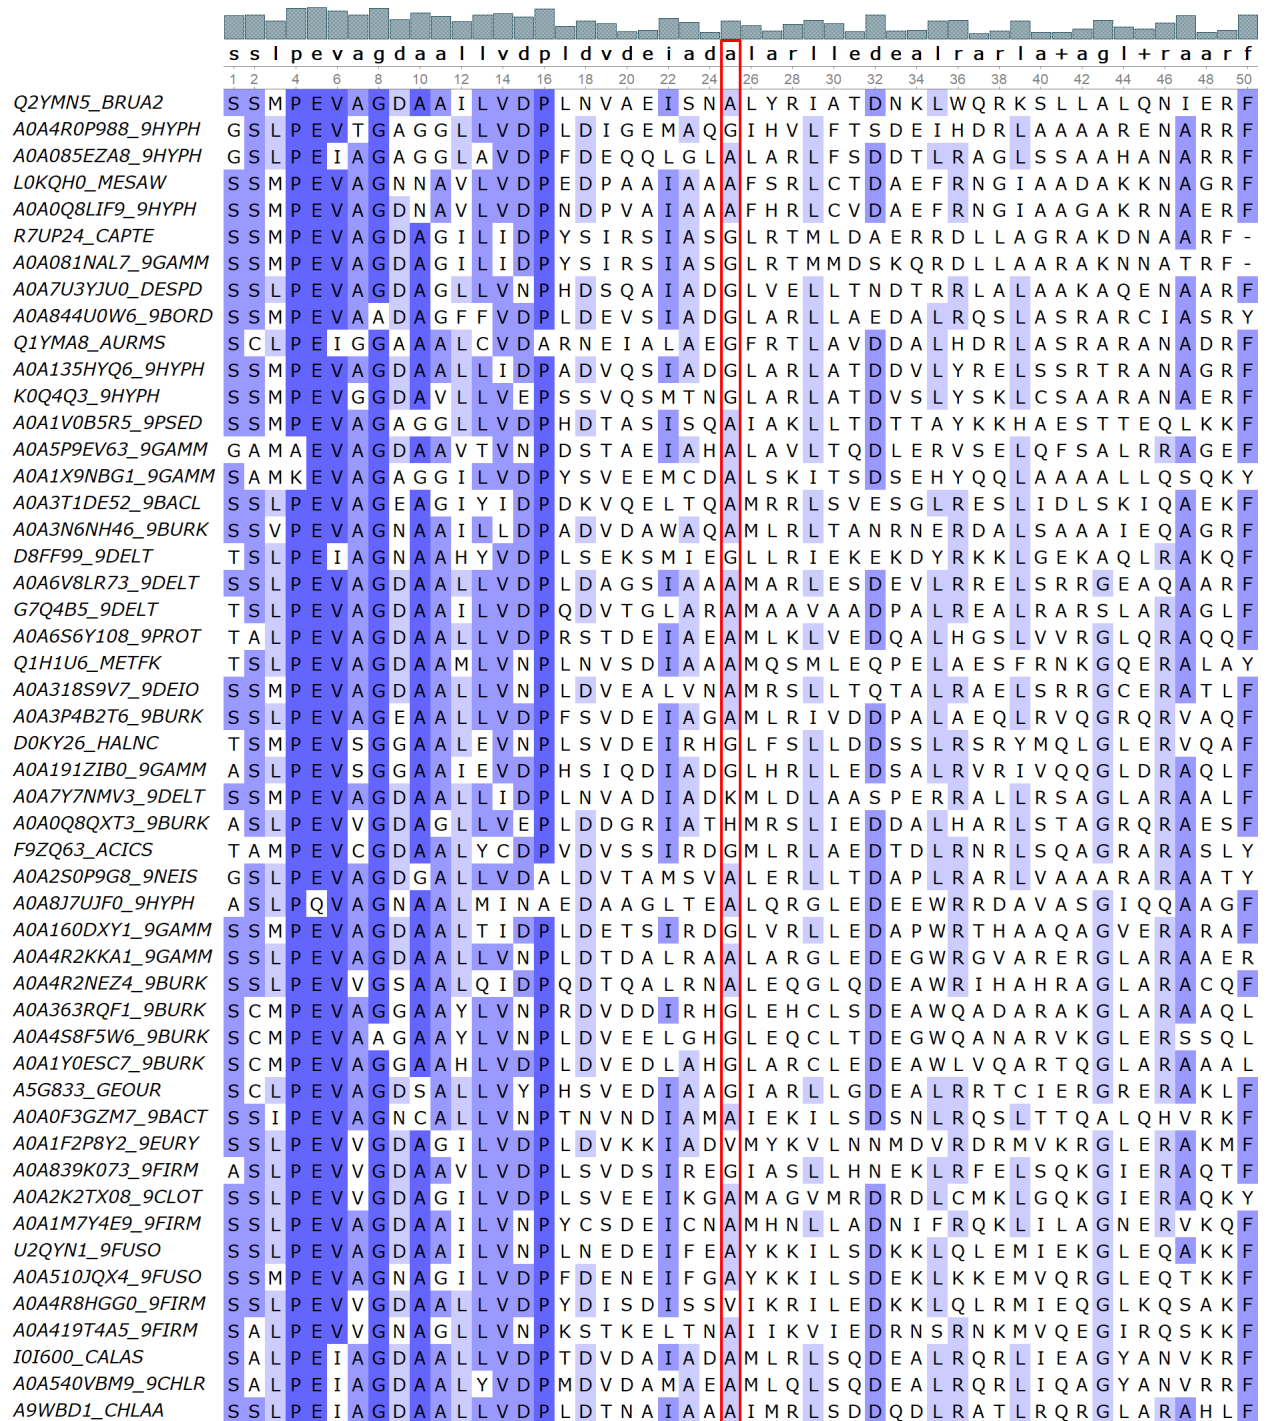

Supplement: Image_1.pdf [file Image_1.pdf]
